# Supplementary material
Source: PubMed Central journal article supplement (PMC6500117)
Supplement: pnas.1821487116.sapp.pdf [file pnas.1821487116.sapp.pdf]

# PNAS

www.pnas.org

**Cytosolic Fe-superoxide dismutase safeguards *Trypanosoma cruzi* from macrophage-derived superoxide radical**

Alejandra Martínez<sup>1</sup>, Carolina Prolo<sup>1</sup>, Damián Estrada<sup>1</sup>, Natalia Rios<sup>1</sup>, María Noel Alvarez<sup>1</sup>, Dolores Piñeyro<sup>1,2</sup>, Carlos Robello<sup>1,2</sup>, Rafael Radi<sup>1\*</sup> and Lucía Piacenza<sup>1\*</sup>.

\* **To whom correspondence should be addressed:** Dr. Lucía Piacenza, e-mail: [lpiacenza@fmed.edu.uy](mailto:lpiacenza@fmed.edu.uy) and Dr. Rafael Radi, e-mail: [rradi@fmed.edu.uy](mailto:rradi@fmed.edu.uy). Departamento de Bioquímica and Center for Free Radical and Biomedical Research, Facultad de Medicina, Universidad de la República, Montevideo 11800, Uruguay.  
Paste the full author list here

**Supplementary Information Text, Figure 1**

**NOX-2 activity and infection rate in bafilomycin A1 or DPI treated macrophages. A.** DPI and Bafilomycin A1 effect on NOX-2 activity was evaluated by the NBT assay. Treated or untreated J774A.1 macrophages were infected with *T. cruzi* (5:1, parasite:macrophage ratio) in dPBS containing NBT (1 mg/mL). Slides were incubated at 37 °C for 30 min and cells were observed by differential interference contrast (DIC) microscopy (x400 magnification, 400 µm scale bar). Arrows indicate formazan-stained inclusions within phagocytic vacuoles. **B.** Treated or untreated J774A.1 macrophages were infected with *T. cruzi* (5:1, parasite:macrophage ratio) for 2 h at 37°C, rinsed with dPBS, fixed for 10 min in formaldehyde (4 %v/v) at room temperature and stained with DAPI (5 µg/mL). Invasion rate was calculated as the number of intracellular amastigotes per 100 macrophages counted by fluorescence microscopy. Data represent the mean ± SEM of 2 samples.

Fig. S1.

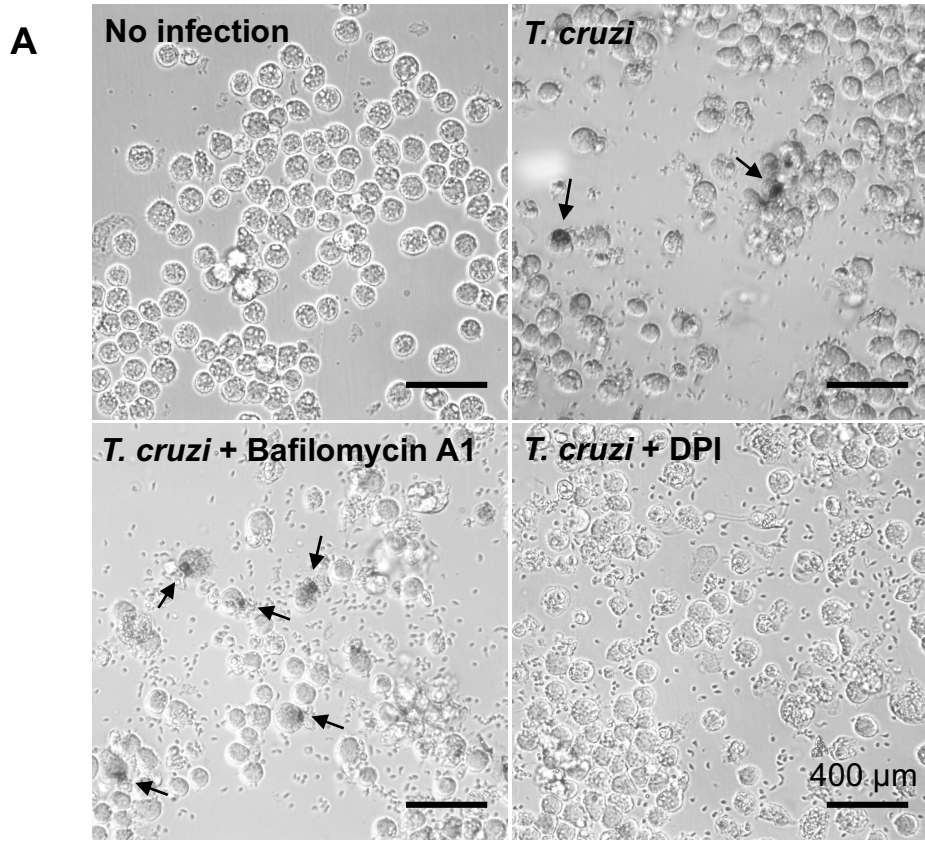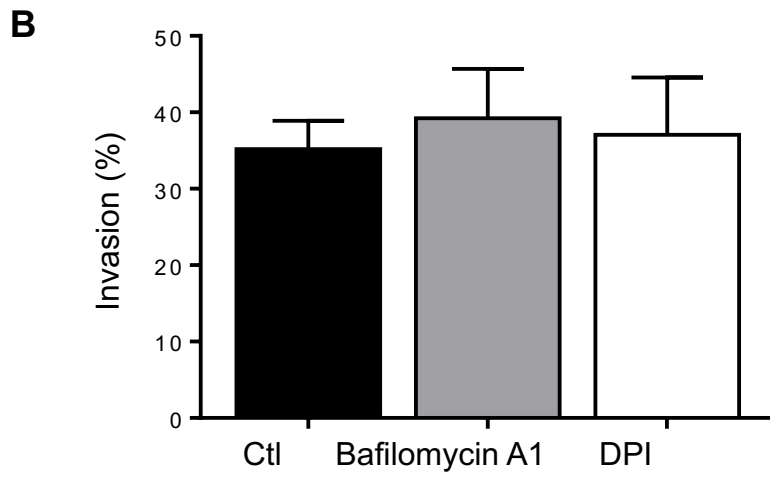

## Supplementary Information Text

### Materials and Methods

#### Generation of Fe-SODB-Overexpressing Parasites and Enzyme Concentration

For transfection experiments, midlog-phase Dm28c epimastigotes ( $5 \times 10^7$  cells per mL) were resuspended in 400  $\mu$ L of Hepes buffer (Hepes, 21 mM; NaCl, 137 mM; KCl, 5 mM; glucose, 6 mM, pH 7.4) containing pRIBOTEX-Fe-SODB DNA (100  $\mu$ g). Transfection was performed by two pulses of 450 V, 50  $\mu$ F, and 25  $\Omega$  (ECM 630 Electro Cell Manipulator; BTX). Electroporated cells were cultured in Brain Heart Infusion media (10 mL) and G418 was gradually added until 500  $\mu$ g/mL was reached in the media.

#### Exposure of Parasites to External $O_2^-$ Fluxes

**Parasites extracts.** Parasites were lysed in PBS plus Triton X-100 (0.1% vol/vol) by passing 50 times by syringe needle [27G x 0.5 in. (0.4 x 13 mm)]. Organic extraction of DHE-derived products and protein precipitation were performed with acetonitrile (ACN) (100  $\mu$ L, 30 min at 4  $^{\circ}$ C). Samples were centrifuged (20,000 g, 30 min at 4  $^{\circ}$ C), and organic phase was removed and dried in a vacuum evaporator at 40  $^{\circ}$ C, 100 mbar, and 40 rpm. Samples were resuspended in 20  $\mu$ L of sample buffer [90% water; 10% ACN; and 0.1% trifluoroacetic acid (TFA)].

#### pH Determination of *T. cruzi*-containing Macrophage phagosomes

**Generation of *T. cruzi* polyclonal antibodies.** Epimastigotes ( $1 \times 10^9$ ) were lysed in PBS containing digitonin (1 mg/mL) and protease inhibitors (Sigma) for 15 min on ice. The sample was washed by centrifugation (20,000 g, 15 min at 4  $^{\circ}$ C), and the pellet (membrane enriched) was resuspended in solubilization buffer (NaCl, 150 mM; Triton X-100, 1% vol/vol; deoxycholate, 0.5% vol/vol; and SDS, 0.1% wt/vol in 50 mM Tris pH 7.4 containing protease inhibitors; Sigma) for 20 min at room temperature. The extract was centrifuged (20,000 g, 30 min at 4  $^{\circ}$ C), and the supernatant was used for rabbit immunization.
